# Supplementary material for: Sulphur-rich functionalized calix[4]arenes for selective complexation of Hg2+over Cu2+, Zn2+and Cd2+
Source: Royal Society of Chemistry journal article supplement (doi:10.1039/c6dt02628a), 2016-01-01
Supplement: c6dt02628a1.pdf [file c6dt02628a1.pdf]

# **Sulphur-rich Functionalized Calix[4]arenes for selective complexation of Hg<sup>2+</sup> over Cu<sup>2+</sup>, Zn<sup>2+</sup> and Cd<sup>2+</sup>**

Bachir Bensenane,<sup>a,b</sup> Zouhair Asfari,<sup>a</sup> Carlos Platas-Iglesias,<sup>c\*</sup> David Esteban-Gómez,<sup>c</sup> Fatiha Djafri,<sup>b</sup> Mourad Elhabiri<sup>d\*</sup> and Loïc J. Charbonnière<sup>a\*</sup>

a. Laboratoire d'Ingénierie Moléculaire Appliquée à l'Analyse (LIMAA), IPHC - UMR 7178 – CNRS, ECPM, Bât R1N0, 25 rue Becquerel, 67087 Strasbourg Cedex 02, France. Email: l.Charbonn@unistra.fr

b. Laboratoire de chimie des matériaux, Faculté des sciences, Université d'Oran, B.P. 1524 El-Menouer, 31000 Oran, Algeria.

c. Universidade da Coruña, Centro de Investigacións Científicas Avanzadas (CICA) and Departamento de Química Fundamental, Facultade de Ciencias,, 15071, A Coruña, Galicia, Spain. Email: carlos.platas.iglesias@udc.es

d. Laboratoire de Chimie Bioorganique et Médicinale, UMR 7509 – CNRS, ECPM, 25, rue Becquerel, 67087 Strasbourg Cedex 02, France. E-mail: elhabiri@unistra.fr

**Supplementary information (30 pages including this one)**

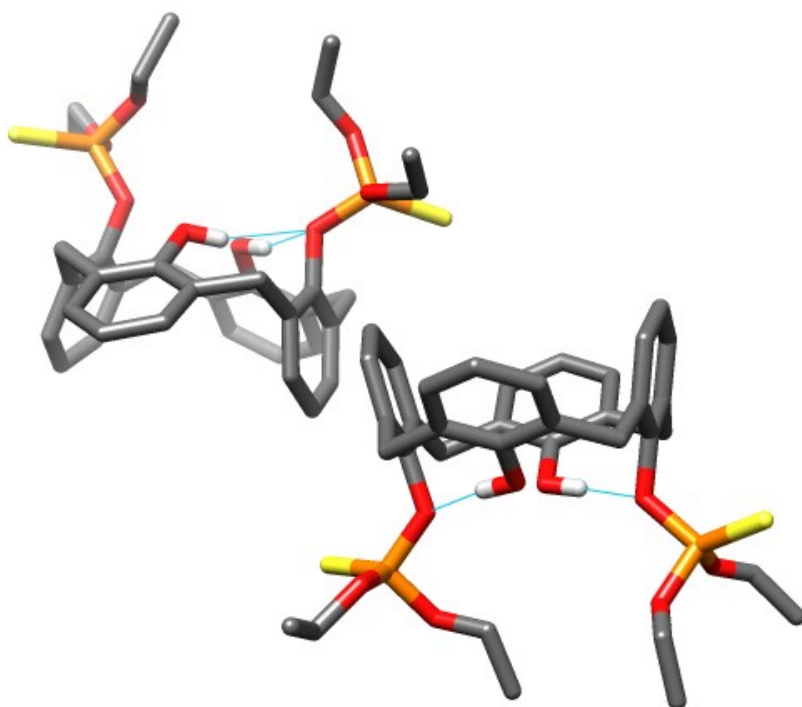

**Figure S1.** Representation of the unit cell of the X-Ray crystal structure of **L1**.

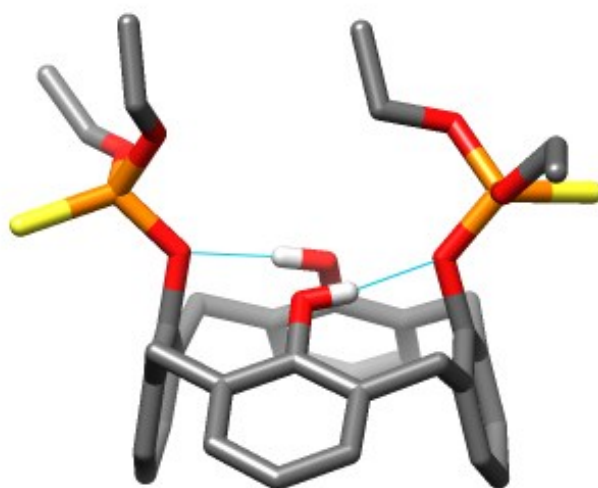

**Figure S2.** X-Ray crystal structure of **L1**.

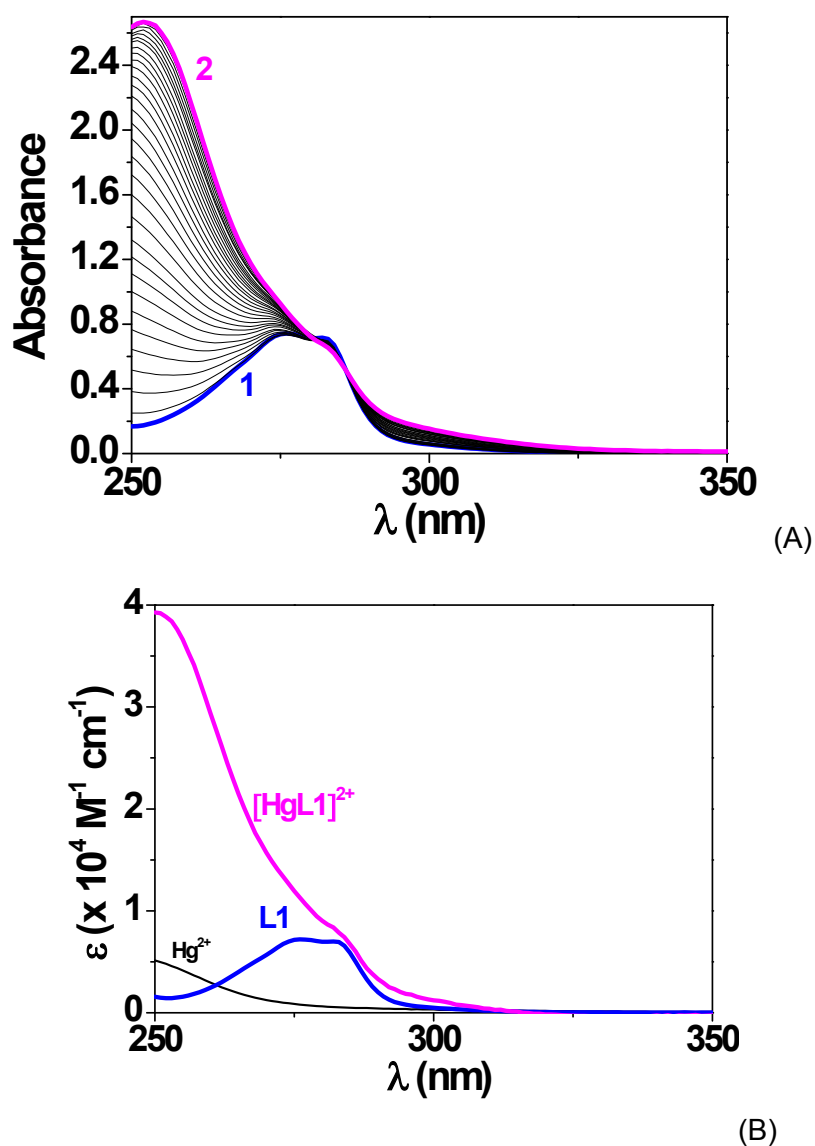

**Figure S3.** (a) Absorption spectrophotometric titration of **L1** by  $\text{Hg}^{2+}$ . Solvent:  $\text{CH}_3\text{CN}/\text{CH}_2\text{Cl}_2$  (1/1 v/v);  $I = 0.01 \text{ M}$   $(\text{C}_2\text{H}_5)_4\text{NNO}_3$ ;  $T = 25.0(2)^\circ\text{C}$ ;  $\square = 1 \text{ cm}$ ;  $[\text{L1}]_0 = 10^{-4} \text{ M}$ ; (1)  $[\text{Hg}^{2+}]_0/[\text{L1}]_0 = 0$ ; (2)  $[\text{Hg}^{2+}]_0/[\text{L1}]_0 = 5$ . The spectra are not corrected from the dilution effects. (b) Absorption electronic spectra of **L1** and its  $\text{Hg}^{2+}$  monochelate.

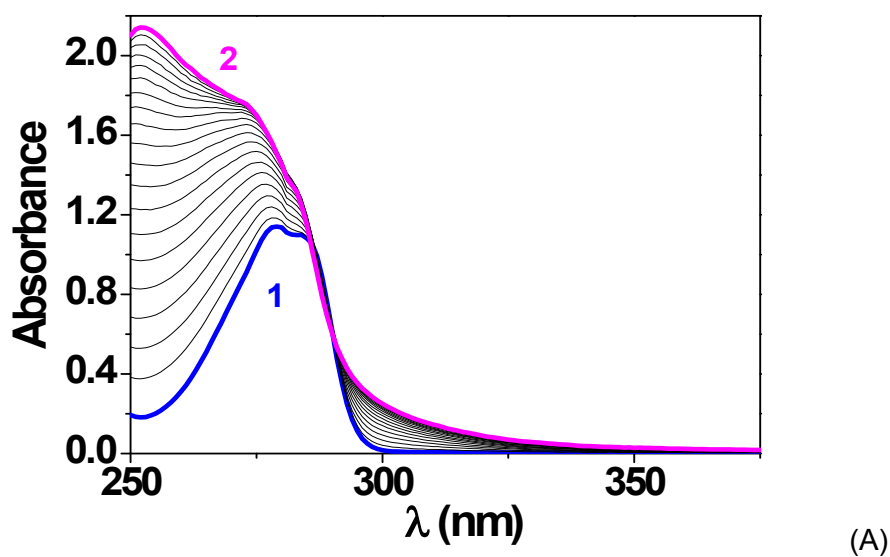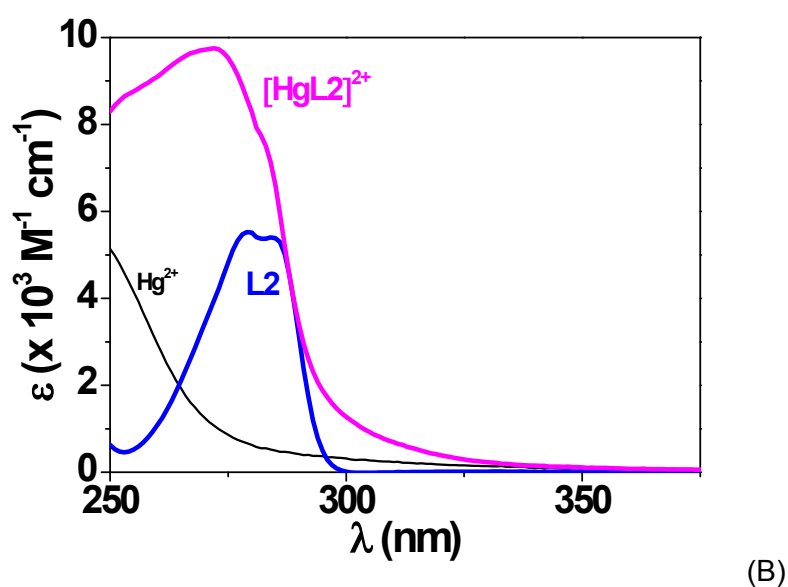

**Figure S4.** (a) Absorption spectrophotometric titration of **L2** by  $\text{Hg}^{2+}$ . Solvent:  $\text{CH}_3\text{CN}/\text{CH}_2\text{Cl}_2$  (1/1 v/v);  $I = 0.01 \text{ M}$   $(\text{C}_2\text{H}_5)_4\text{NNO}_3$ ;  $T = 25.0(2)^\circ\text{C}$ ;  $\square = 1 \text{ cm}$ ;  $[\text{L2}]_0 = 10^{-4} \text{ M}$ ; (1)  $[\text{Hg}^{2+}]_0/[\text{L2}]_0 = 0$ ; (2)  $[\text{Hg}^{2+}]_0/[\text{L2}]_0 = 2$ . The spectra are not corrected from the dilution effects. (b) Absorption electronic spectra of **L2** and its  $\text{Hg}^{2+}$  monochelate.

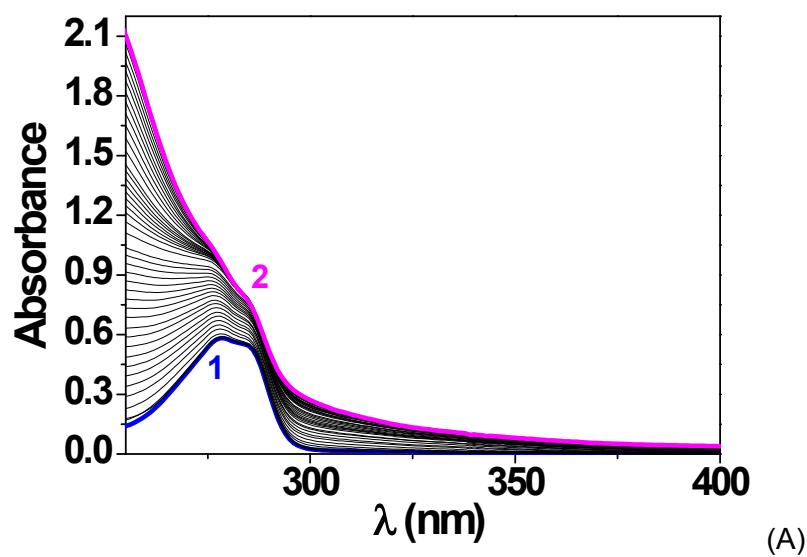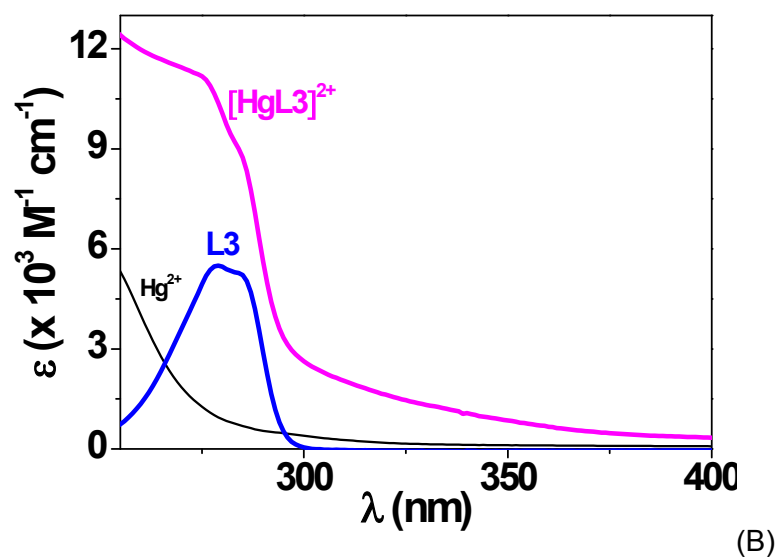

**Figure S5.** (a) Absorption spectrophotometric titration of **L3** by  $\text{Hg}^{2+}$ . Solvent:  $\text{CH}_3\text{CN}/\text{CH}_2\text{Cl}_2$  (1/1 v/v);  $I = 0.01 \text{ M}$   $(\text{C}_2\text{H}_5)_4\text{NNO}_3$ ;  $T = 25.0(2)^\circ\text{C}$ ;  $\square = 1 \text{ cm}$ ;  $[\text{L3}]_0 = 10^{-4} \text{ M}$ ; (1)  $[\text{Hg}^{2+}]_0/[\text{L3}]_0 = 0$ ; (2)  $[\text{Hg}^{2+}]_0/[\text{L3}]_0 = 3$ . The spectra are not corrected from the dilution effects. (b) Absorption electronic spectra of **L3** and its  $\text{Hg}^{2+}$  monochelate.

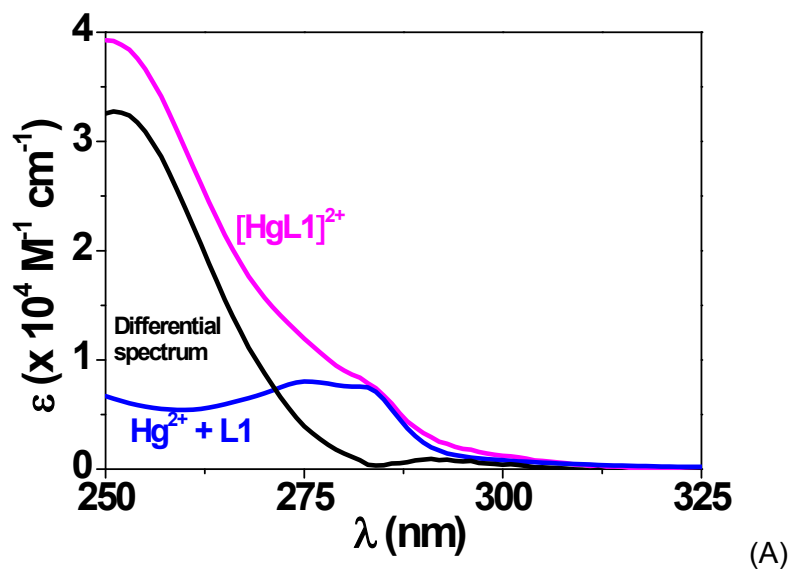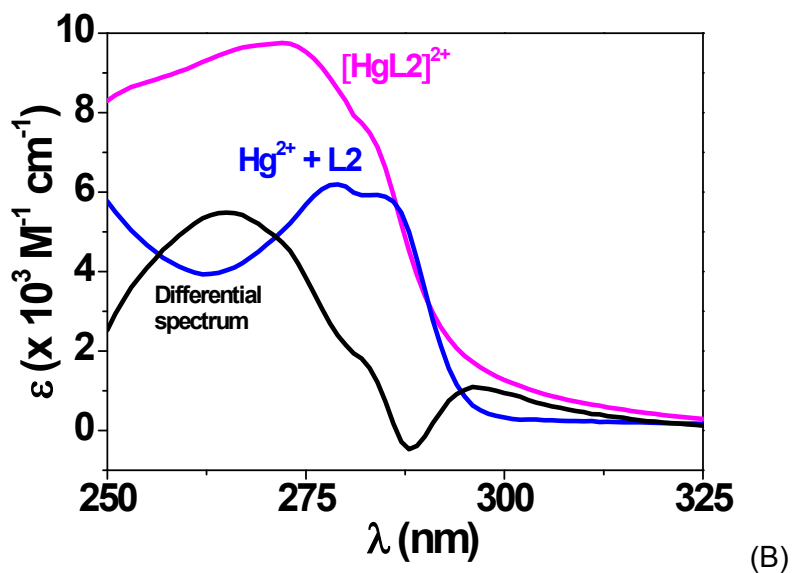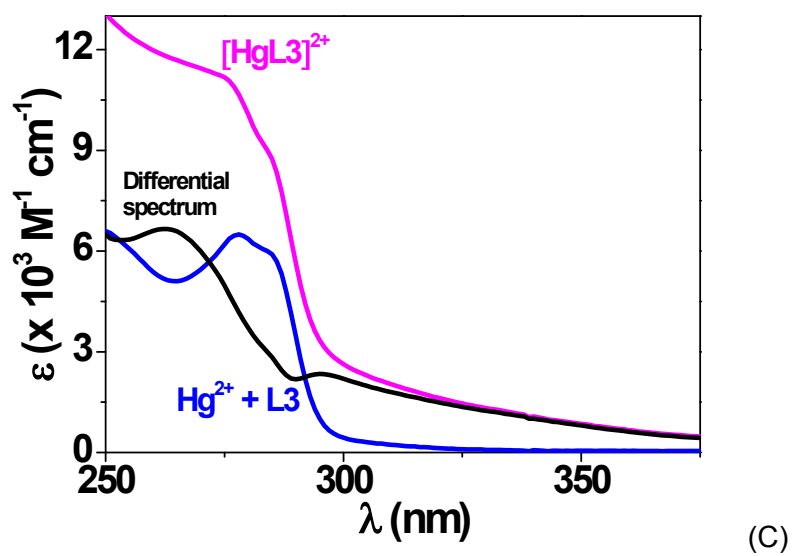

**Figure S6.** Differential Electronic spectra of the mercuric complexes with ligands (a) L1, (b) L2, and (c) L3. Solvent:  $\text{CH}_3\text{CN}/\text{CH}_2\text{Cl}_2$  (1/1 v/v);  $I = 0.01 \text{ M } (\text{C}_2\text{H}_5)_4\text{NNO}_3$ ;  $T = 25.0(2)^\circ\text{C}$ .

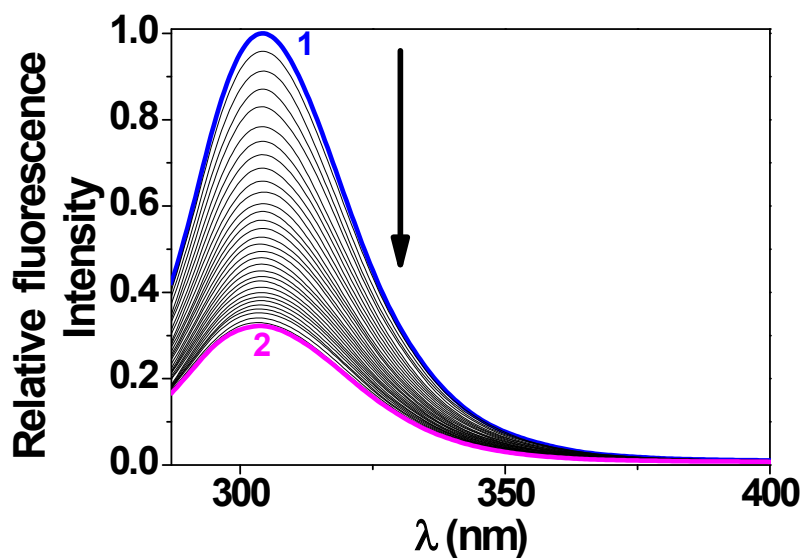

**Figure S7.** Spectrofluorimetric titration of ligand **L1** ( $\lambda_{\text{exc}} = 289 \text{ nm}$ ) by  $\text{Hg}^{2+}$ . Solvent:  $\text{CH}_3\text{CN}/\text{CH}_2\text{Cl}_2$  (1/1 v/v);  $I = 0.01 \text{ M } (\text{C}_2\text{H}_5)_4\text{NNO}_3$ ;  $T = 25.0(2) \text{ }^\circ\text{C}$ ;  $\square = 1 \text{ cm}$ ;  $[\text{L1}]_0 = 10^{-4} \text{ M}$ ; (1)  $[\text{Hg}^{2+}]_0/[\text{L1}]_0 = 0$ ; (2)  $[\text{Hg}^{2+}]_0/[\text{L1}]_0 = 2$ . Emission spectra not corrected from dilution effects.

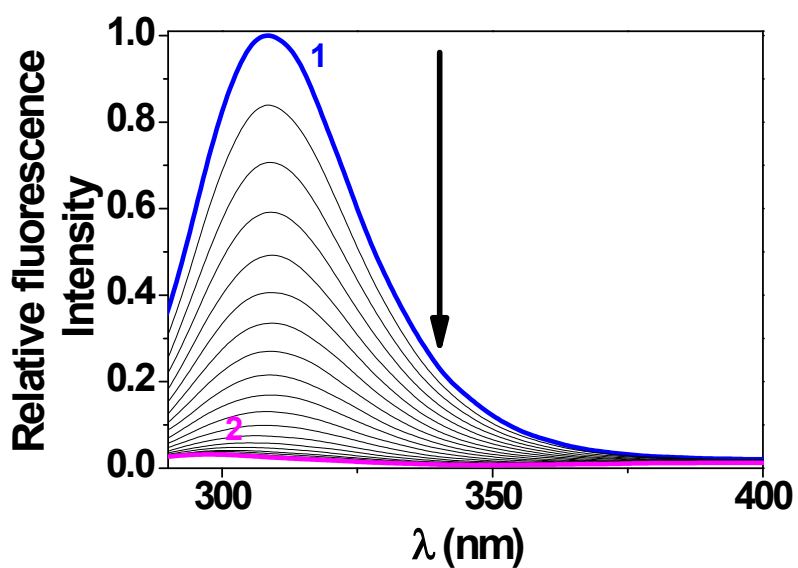

**Figure S8.** Spectrofluorimetric titration of ligand **L2** ( $\lambda_{\text{exc}} = 289 \text{ nm}$ ) by  $\text{Hg}^{2+}$ . Solvent:  $\text{CH}_3\text{CN}/\text{CH}_2\text{Cl}_2$  (1/1 v/v);  $I = 0.01 \text{ M } (\text{C}_2\text{H}_5)_4\text{NNO}_3$ ;  $T = 25.0(2) \text{ }^\circ\text{C}$ ;  $\square = 1 \text{ cm}$ ;  $[\text{L2}]_0 = 10^{-4} \text{ M}$ ; (1)  $[\text{Hg}^{2+}]_0/[\text{L2}]_0 = 0$ ; (2)  $[\text{Hg}^{2+}]_0/[\text{L2}]_0 = 2$ . Emission spectra not corrected from dilution effects.



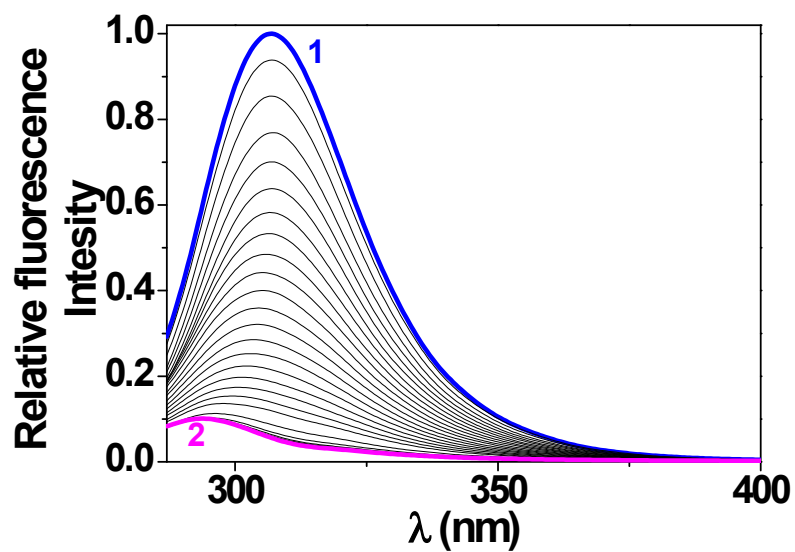

**Figure S9.** Spectrofluorimetric titration of ligand **L3** ( $\lambda_{\text{exc}} = 287 \text{ nm}$ ) by  $\text{Hg}^{2+}$ . Solvent:  $\text{CH}_3\text{CN}/\text{CH}_2\text{Cl}_2$  (1/1 v/v);  $I = 0.01 \text{ M}$  ( $\text{C}_2\text{H}_5)_4\text{NNO}_3$ ;  $T = 25.0(2) \text{ }^\circ\text{C}$ ;  $\square = 1 \text{ cm}$ ;  $[\text{L3}]_0 = 10^{-4} \text{ M}$ ; (1)  $[\text{Hg}^{2+}]_0/[\text{L3}]_0 = 0$ ; (2)  $[\text{Hg}^{2+}]_0/[\text{L3}]_0 = 3$ . Emission spectra not corrected from dilution effects.

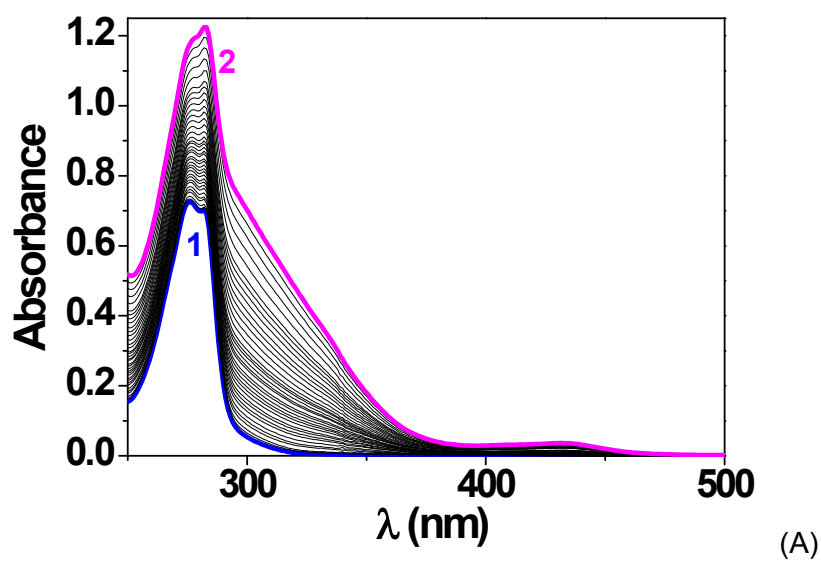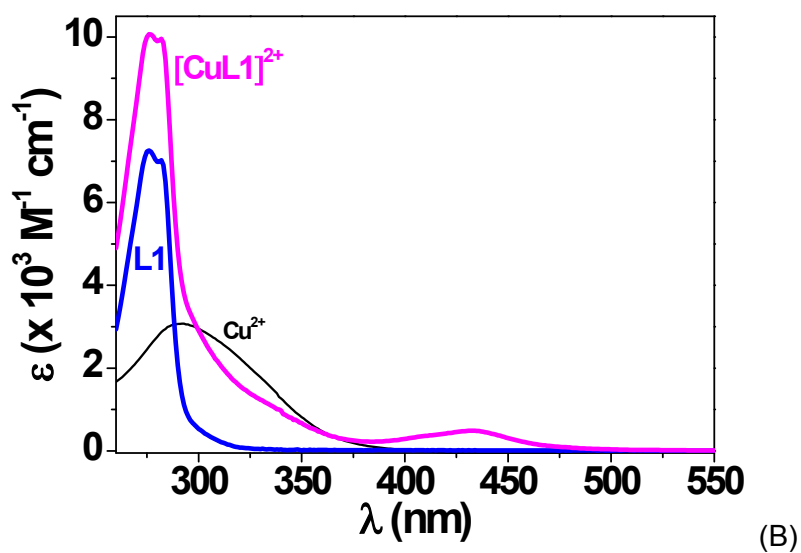

**Figure S10.** (a) Absorption spectrophotometric titration of **L1** by  $\text{Cu}^{2+}$ . Solvent:  $\text{CH}_3\text{CN}/\text{CH}_2\text{Cl}_2$  (1/1 v/v);  $I = 0.01 \text{ M}$  ( $\text{C}_2\text{H}_5)_4\text{NNO}_3$ ;  $T = 25.0(2)^\circ\text{C}$ ;  $\square = 1 \text{ cm}$ ;  $[\text{L1}]_0 = 10^{-4} \text{ M}$ ; (1)  $[\text{Cu}^{2+}]_0/[\text{L1}]_0 = 0$ ; (2)  $[\text{Cu}^{2+}]_0/[\text{L1}]_0 = 2.5$ . The spectra are not corrected from the dilution effects. (b) Absorption electronic spectra of **L1** and its cupric monochelate.

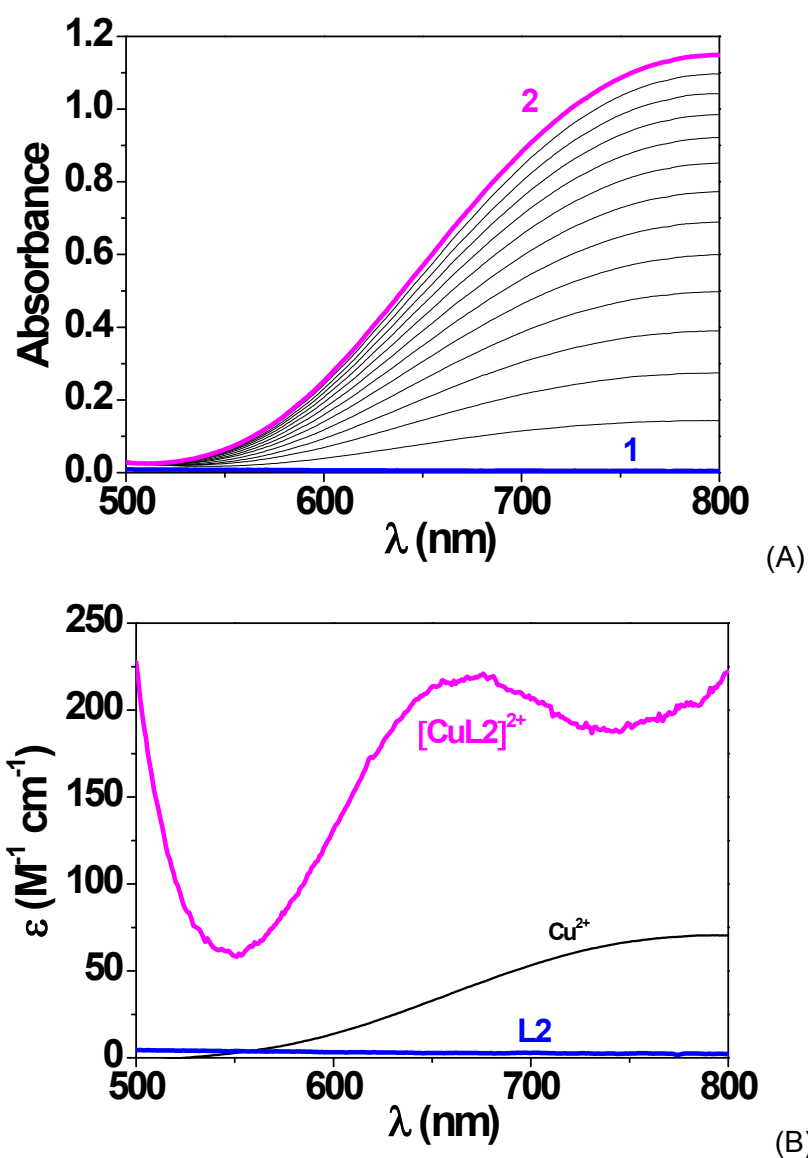

**Figure S11.** (a) Absorption spectrophotometric titration of **L2** by  $\text{Cu}^{2+}$ . Solvent:  $\text{CH}_3\text{CN}/\text{CH}_2\text{Cl}_2$  (1/1 v/v);  $I = 0.01 \text{ M}$   $(\text{C}_2\text{H}_5)_4\text{NNO}_3$ ;  $T = 25.0(2)^\circ\text{C}$ ;  $\square = 1 \text{ cm}$ ;  $[\text{L2}]_0 = 10^{-3} \text{ M}$ ; (1)  $[\text{Cu}^{2+}]_0/[\text{L2}]_0 = 0$ ; (2)  $[\text{Cu}^{2+}]_0/[\text{L2}]_0 = 13$ . The spectra are not corrected from the dilution effects. (b) Absorption electronic spectra of **L2** and its cupric monochelate.

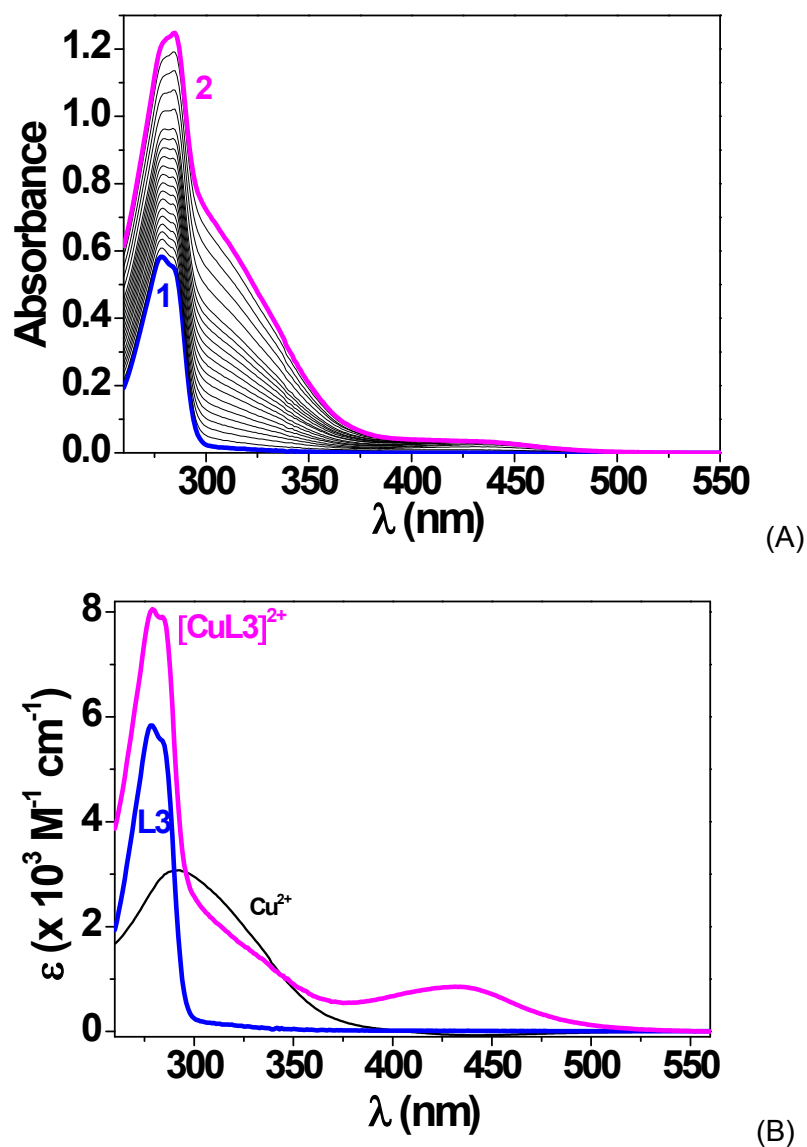

**Figure S12.** (a) Absorption spectrophotometric titration of **L3** by  $\text{Cu}^{2+}$ . Solvent:  $\text{CH}_3\text{CN}/\text{CH}_2\text{Cl}_2$  (1/1 v/v);  $I = 0.01 \text{ M}$   $(\text{C}_2\text{H}_5)_4\text{NNO}_3$ ;  $T = 25.0(2)^\circ\text{C}$ ;  $\square = 1 \text{ cm}$ ;  $[\text{L3}]_0 = 10^{-4} \text{ M}$ ; (1)  $[\text{Cu}^{2+}]_0/[\text{L3}]_0 = 0$ ; (2)  $[\text{Cu}^{2+}]_0/[\text{L3}]_0 = 2.5$ . The spectra are not corrected from the dilution effects. (b) Absorption electronic spectra of **L3** and its cupric monochelete.

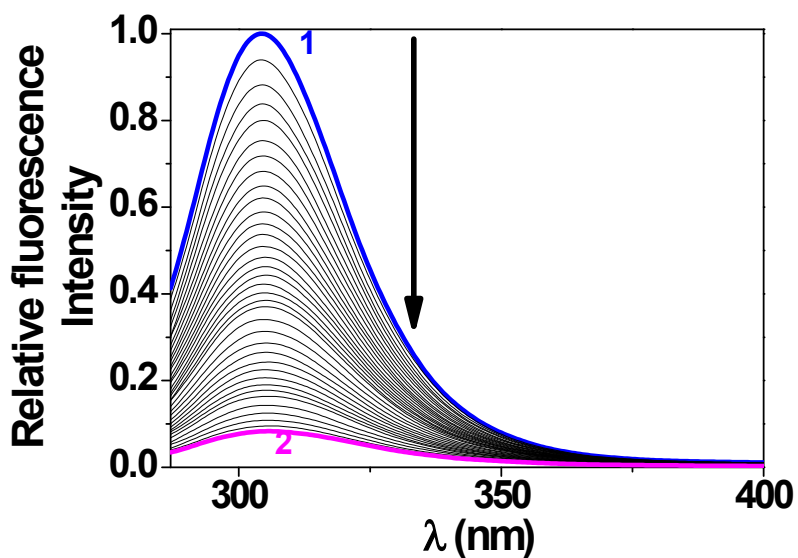

**Figure S13.** Spectrofluorimetric titration of ligand **L1** ( $\lambda_{\text{exc}} = 287 \text{ nm}$ ) by  $\text{Cu}^{2+}$ . Solvent:  $\text{CH}_3\text{CN}/\text{CH}_2\text{Cl}_2$  (1/1 v/v);  $I = 0.01 \text{ M } (\text{C}_2\text{H}_5)_4\text{NNO}_3$ ;  $T = 25.0(2)^\circ\text{C}$ ;  $\square = 1 \text{ cm}$ ;  $[\text{L1}]_0 = 10^{-4} \text{ M}$ ; (1)  $[\text{Cu}^{2+}]_0/[\text{L1}]_0 = 0$ ; (2)  $[\text{Cu}^{2+}]_0/[\text{L1}]_0 = 2.5$ . Emission spectra not corrected from dilution effects.

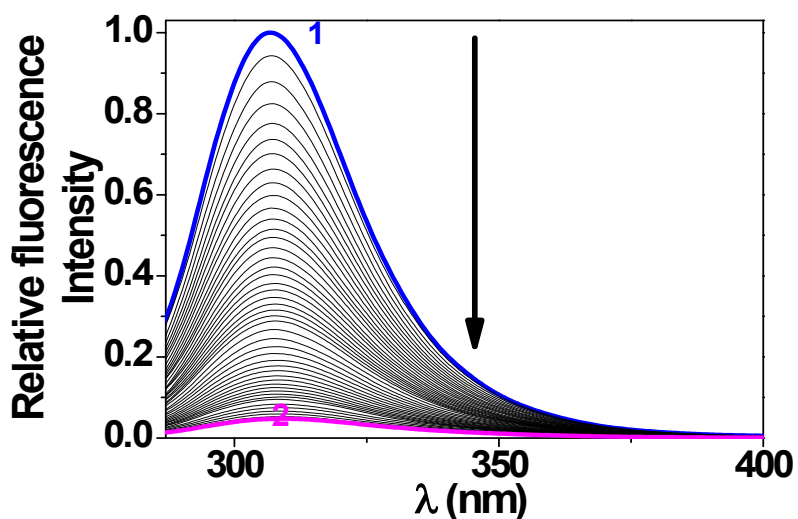

**Figure S14.** Spectrofluorimetric titration of ligand **L3** ( $\lambda_{\text{exc}} = 287 \text{ nm}$ ) by  $\text{Cu}^{2+}$ . Solvent:  $\text{CH}_3\text{CN}/\text{CH}_2\text{Cl}_2$  (1/1 v/v);  $I = 0.01 \text{ M } (\text{C}_2\text{H}_5)_4\text{NNO}_3$ ;  $T = 25.0(2)^\circ\text{C}$ ;  $\square = 1 \text{ cm}$ ;  $[\text{L3}]_0 = 10^{-4} \text{ M}$ ; (1)  $[\text{Cu}^{2+}]_0/[\text{L3}]_0 = 0$ ; (2)  $[\text{Cu}^{2+}]_0/[\text{L3}]_0 = 3.7$ . Emission spectra not corrected from dilution effects.

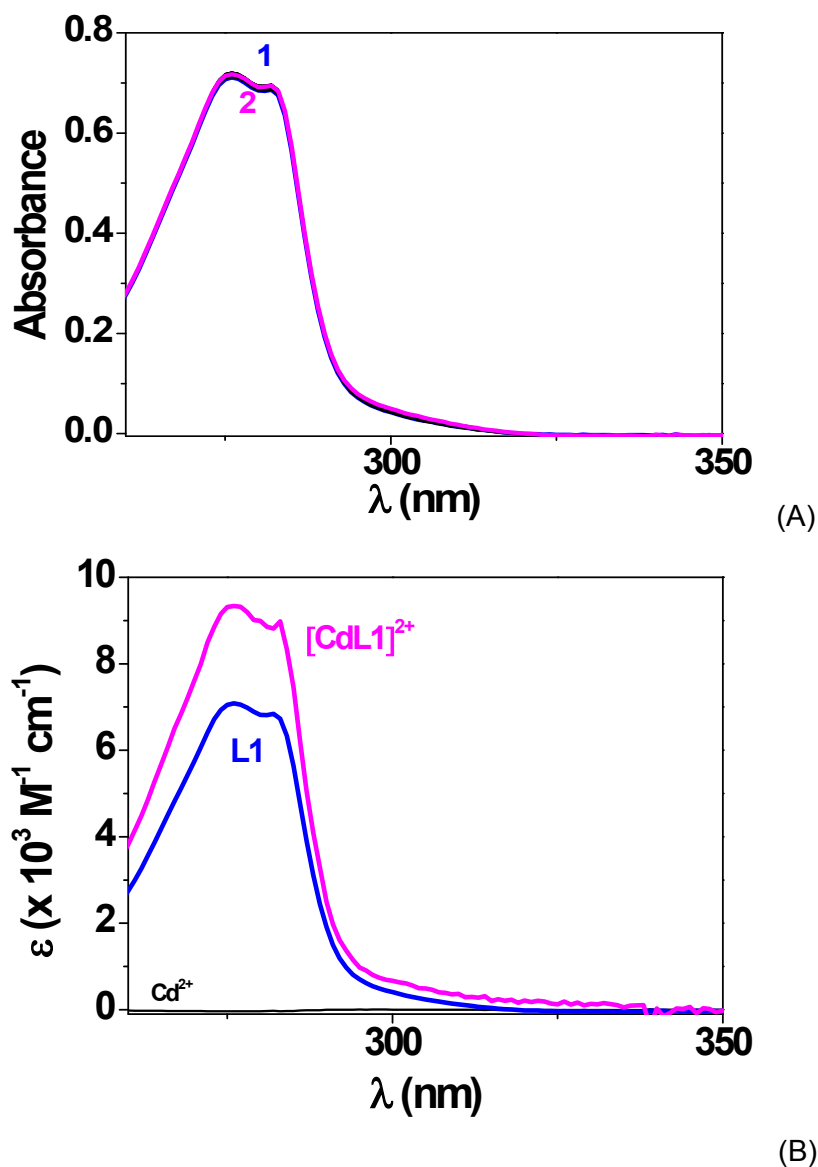

**Figure S15.** (a) Absorption spectrophotometric titration of **L1** by Cd<sup>2+</sup>. Solvent: CH<sub>3</sub>CN/CH<sub>2</sub>Cl<sub>2</sub> (1/1 v/v);  $I = 0.01$  M (C<sub>2</sub>H<sub>5</sub>)<sub>4</sub>NNO<sub>3</sub>;  $T = 25.0(2)^\circ\text{C}$ ;  $\square = 1$  cm; [L1]<sub>0</sub> = 10<sup>-4</sup> M; (1) [Cd<sup>2+</sup>]<sub>0</sub>/[L1]<sub>0</sub> = 0; (2) [Cd<sup>2+</sup>]<sub>0</sub>/[L1]<sub>0</sub> = 9.5. The spectra are not corrected from the dilution effects. (b) Absorption electronic spectra of **L1** and its Cd<sup>2+</sup> monochelate.

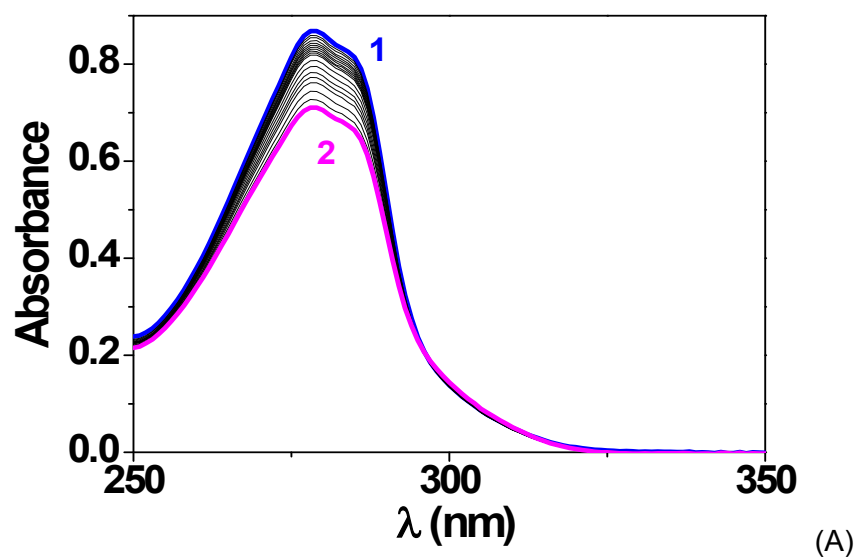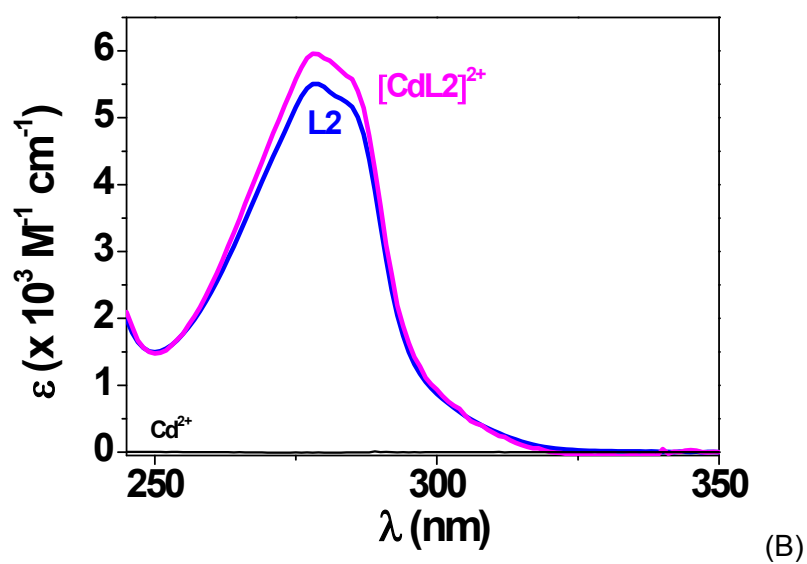

**Figure S16.** (a) Absorption spectrophotometric titration of **L2** by  $\text{Cd}^{2+}$ . Solvent:  $\text{CH}_3\text{CN}/\text{CH}_2\text{Cl}_2$  (1/1 v/v);  $I = 0.01 \text{ M } (\text{C}_2\text{H}_5)_4\text{NNO}_3$ ;  $T = 25.0(2)^\circ\text{C}$ ;  $\square = 1 \text{ cm}$ ;  $[\text{L2}]_0 = 1.58 \times 10^{-4} \text{ M}$ ; (1)  $[\text{Cd}^{2+}]_0/[\text{L2}]_0 = 0$ ; (2)  $[\text{Cd}^{2+}]_0/[\text{L2}]_0 = 2.53$ . The spectra are not corrected from the dilution effects. (b) Absorption electronic spectra of **L2** and its  $\text{Cd}^{2+}$  monochelate.

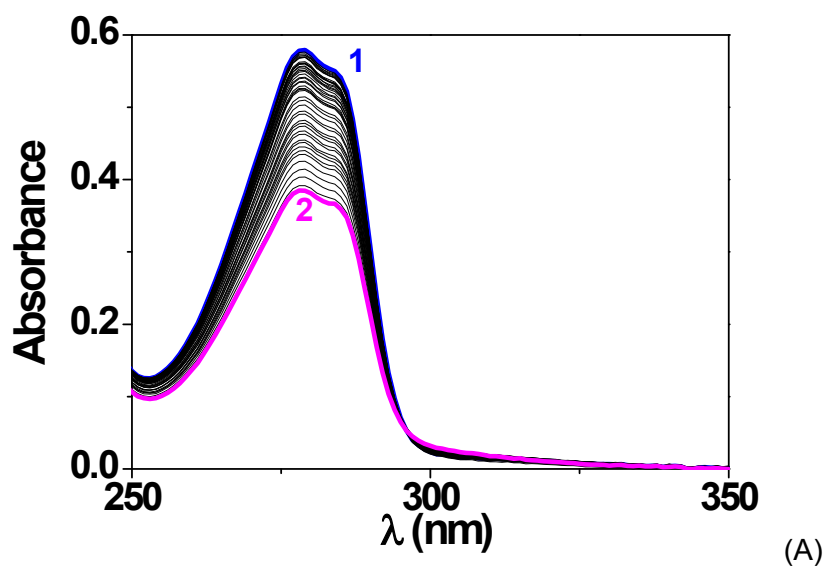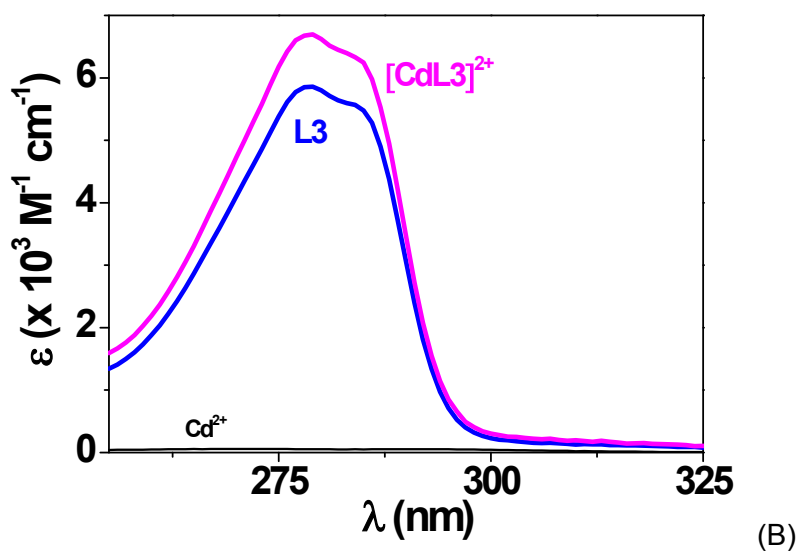

**Figure S17.** (a) Absorption spectrophotometric titration of **L3** by  $\text{Cd}^{2+}$ . Solvent:  $\text{CH}_3\text{CN}/\text{CH}_2\text{Cl}_2$  (1/1 v/v);  $I = 0.01 \text{ M } (\text{C}_2\text{H}_5)_4\text{NNO}_3$ ;  $T = 25.0(2)^\circ\text{C}$ ;  $\square = 1 \text{ cm}$ ;  $[\text{L3}]_0 = 10^{-4} \text{ M}$ ; (1)  $[\text{Cd}^{2+}]_0/[\text{L3}]_0 = 0$ ; (2)  $[\text{Cd}^{2+}]_0/[\text{L3}]_0 = 5$ . The spectra are not corrected from the dilution effects. (b) Absorption electronic spectra of **L3** and its  $\text{Cd}^{2+}$  monochelate.



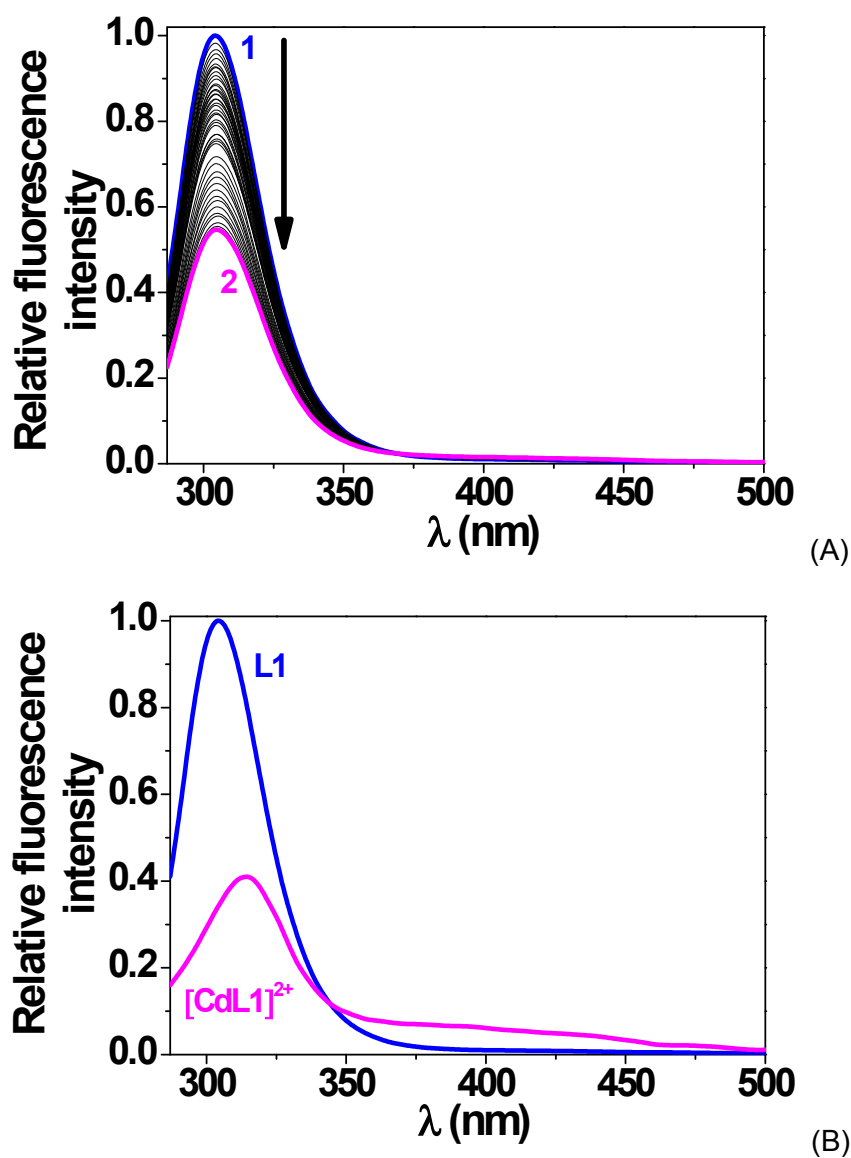

**Figure S18.** (A) Spectrofluorimetric titration of ligand **L1** ( $\lambda_{\text{exc}} = 289$  nm) by  $\text{Cd}^{2+}$ . Solvent:  $\text{CH}_3\text{CN}/\text{CH}_2\text{Cl}_2$  (1/1 v/v);  $I = 0.01$  M  $(\text{C}_2\text{H}_5)_4\text{NNO}_3$ ;  $T = 25.0(2)^\circ\text{C}$ ;  $\square = 1$  cm;  $[\text{L1}]_0 = 10^{-4}$  M; (1)  $[\text{Cd}^{2+}]_0/[\text{L1}]_0 = 0$ ; (2)  $[\text{Cd}^{2+}]_0/[\text{L1}]_0 = 2.5$ . Emission spectra not corrected from dilution effects. (B) Reconstituted fluorescence emission spectra of **L1** and its  $\text{Cd}^{2+}$  monochelate.

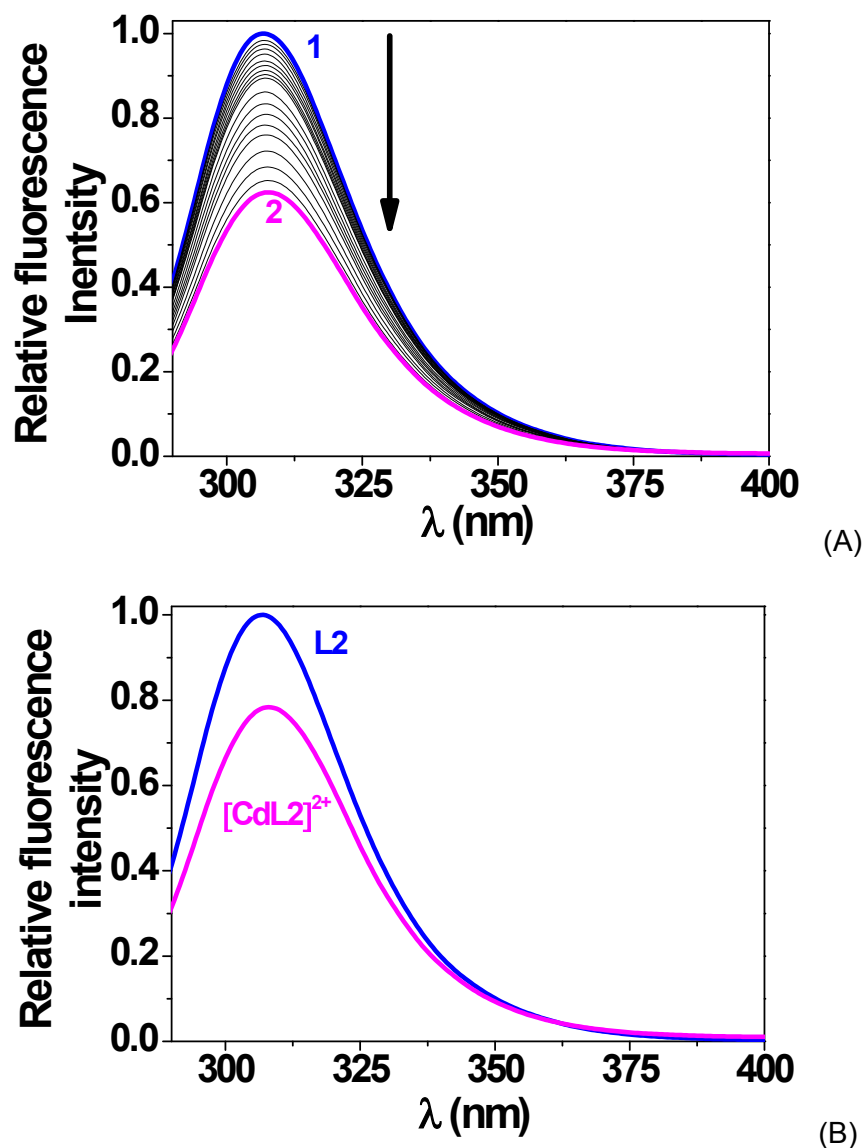

**Figure S19.** (A) Spectrofluorimetric titration of ligand **L2** ( $\lambda_{\text{exc}} = 287$  nm) by  $\text{Cd}^{2+}$ . Solvent:  $\text{CH}_3\text{CN}/\text{CH}_2\text{Cl}_2$  (1/1 v/v);  $I = 0.01$  M  $(\text{C}_2\text{H}_5)_4\text{NNO}_3$ ;  $T = 25.0(2)$  °C;  $\square = 1$  cm;  $[\text{L2}]_0 = 1.58 \times 10^{-4}$  M; (1)  $[\text{Cd}^{2+}]_0/[\text{L2}]_0 = 0$ ; (2)  $[\text{Cd}^{2+}]_0/[\text{L2}]_0 = 5$ . Emission spectra not corrected from dilution effects. (B) Reconstituted fluorescence emission spectra of **L2** and its  $\text{Cd}^{2+}$  monochelate.

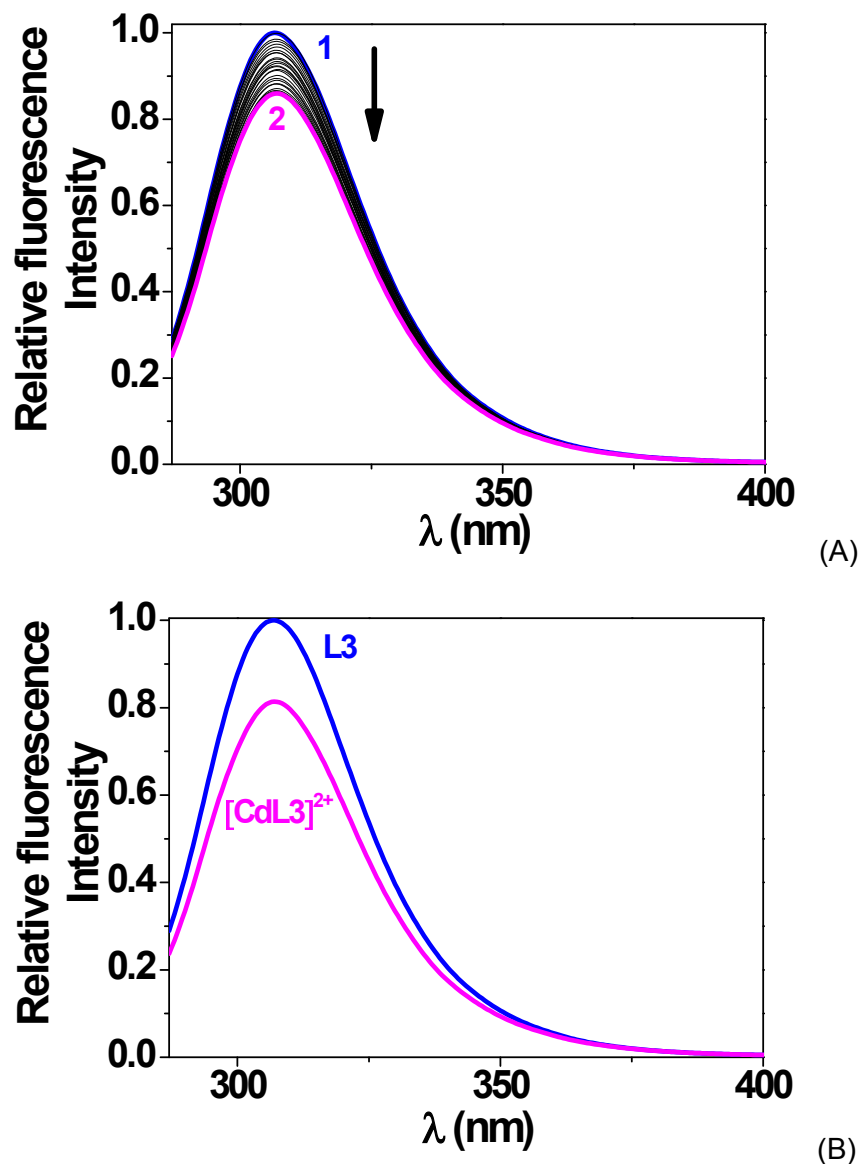

**Figure S20.** (A) Spectrofluorimetric titration of ligand **L3** ( $\lambda_{\text{exc}} = 287$  nm) by  $\text{Cd}^{2+}$ . Solvent:  $\text{CH}_3\text{CN}/\text{CH}_2\text{Cl}_2$  (1/1 v/v);  $I = 0.01$  M  $(\text{C}_2\text{H}_5)_4\text{NNO}_3$ ;  $T = 25.0(2)^\circ\text{C}$ ;  $\square = 1$  cm;  $[\text{L3}]_0 = 10^{-4}$  M; (1)  $[\text{Cd}^{2+}]_0/[\text{L3}]_0 = 0$ ; (2)  $[\text{Cd}^{2+}]_0/[\text{L3}]_0 = 7$ . Emission spectra not corrected from dilution effects. (B) Reconstituted fluorescence emission spectra of **L3** and its  $\text{Cd}^{2+}$  monochelate.

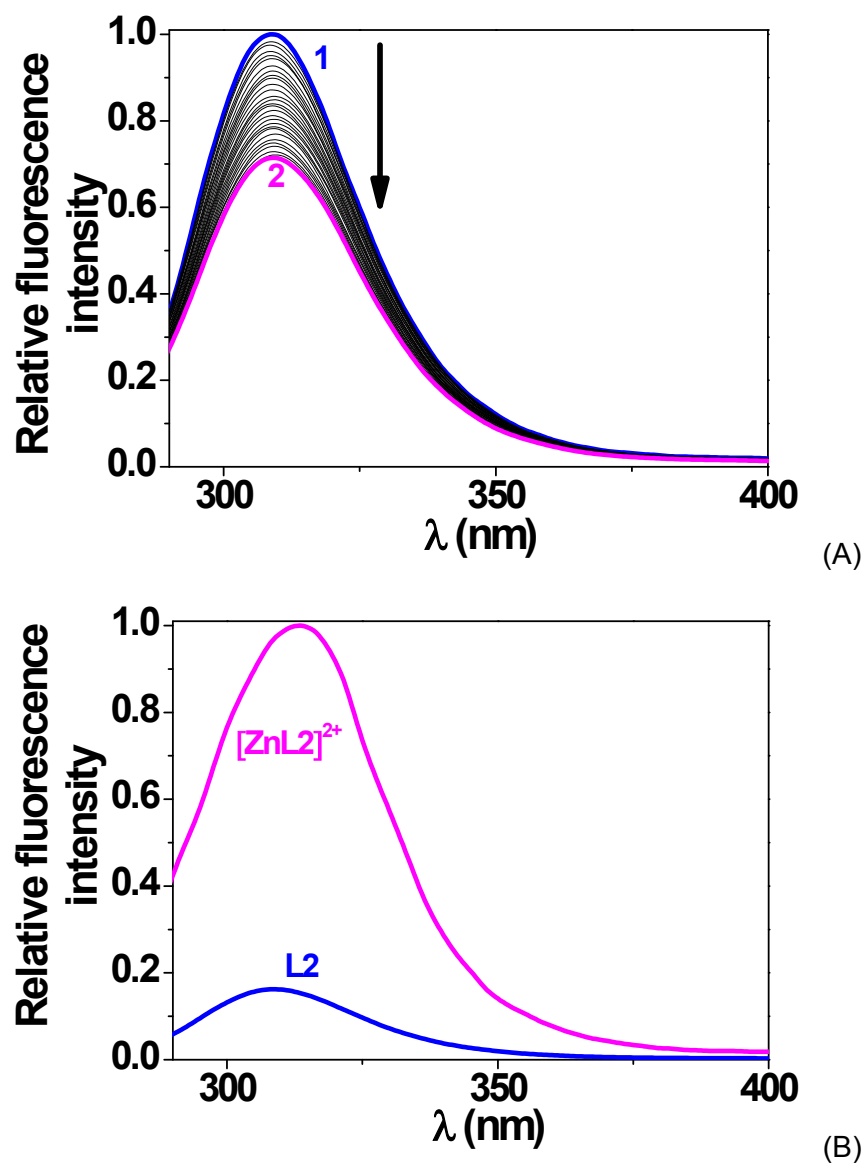

**Figure S21.** (A) Spectrofluorimetric titration of ligand **L2** ( $\lambda_{\text{exc}} = 289$  nm) by  $\text{Zn}^{2+}$ . Solvent:  $\text{CH}_3\text{CN}/\text{CH}_2\text{Cl}_2$  (1/1 v/v);  $I = 0.01$  M  $(\text{C}_2\text{H}_5)_4\text{NNO}_3$ ;  $T = 25.0(2)$  °C;  $\square = 1$  cm;  $[\text{L2}]_0 = 1.58 \times 10^{-4}$  M; (1)  $[\text{Zn}^{2+}]_0/[\text{L2}]_0 = 0$ ; (2)  $[\text{Zn}^{2+}]_0/[\text{L2}]_0 = 85.4$ . Emission spectra not corrected from dilution effects. (B) Reconstituted fluorescence emission spectra of **L2** and its  $\text{Zn}^{2+}$  monochelate.

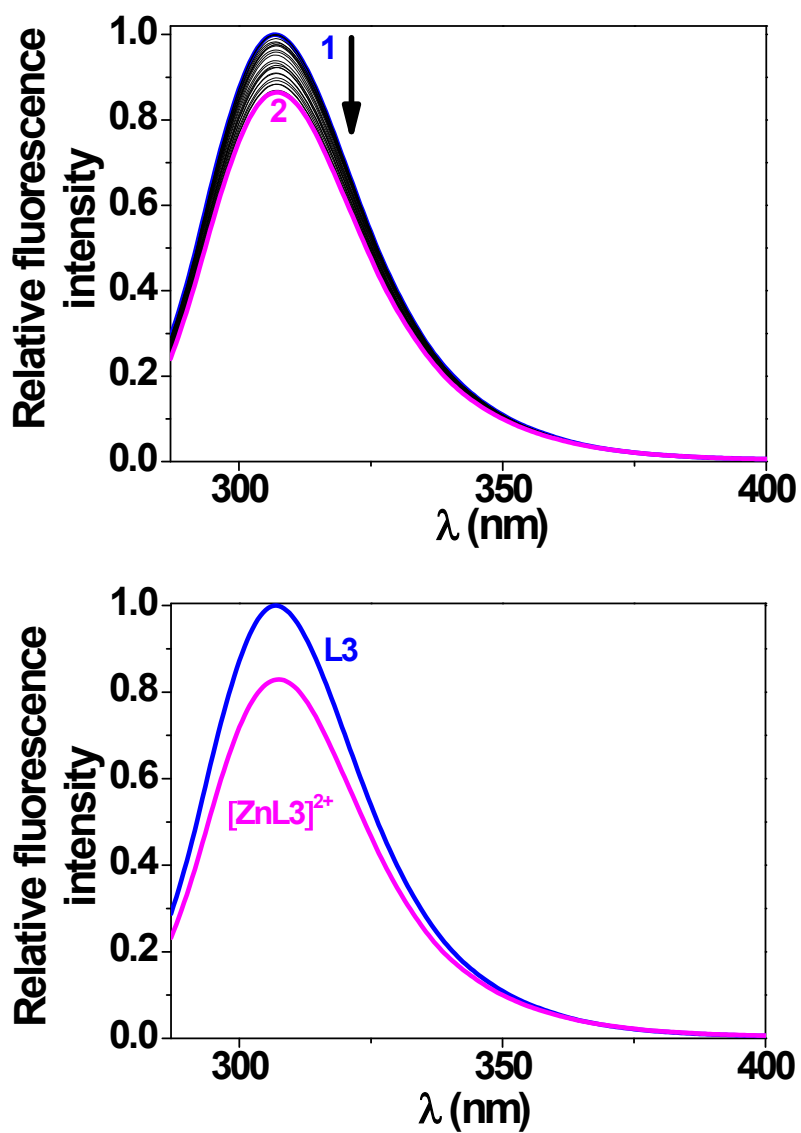

**Figure S22.** (A) Spectrofluorimetric titration of ligand **L3** ( $\lambda_{\text{exc}} = 287$  nm) by  $\text{Zn}^{2+}$ . Solvent:  $\text{CH}_3\text{CN}/\text{CH}_2\text{Cl}_2$  (1/1 v/v);  $I = 0.01$  M  $(\text{C}_2\text{H}_5)_4\text{NNO}_3$ ;  $T = 25.0(2)$  °C;  $\square = 1$  cm;  $[\text{L3}]_0 = 10^{-4}$  M; (1)  $[\text{Zn}^{2+}]_0/[\text{L3}]_0 = 0$ ; (2)  $[\text{Zn}^{2+}]_0/[\text{L3}]_0 = 9.4$ . Emission spectra not corrected from dilution effects. (B) Reconstituted fluorescence emission spectra of **L3** and its  $\text{Zn}^{2+}$  monochelate.

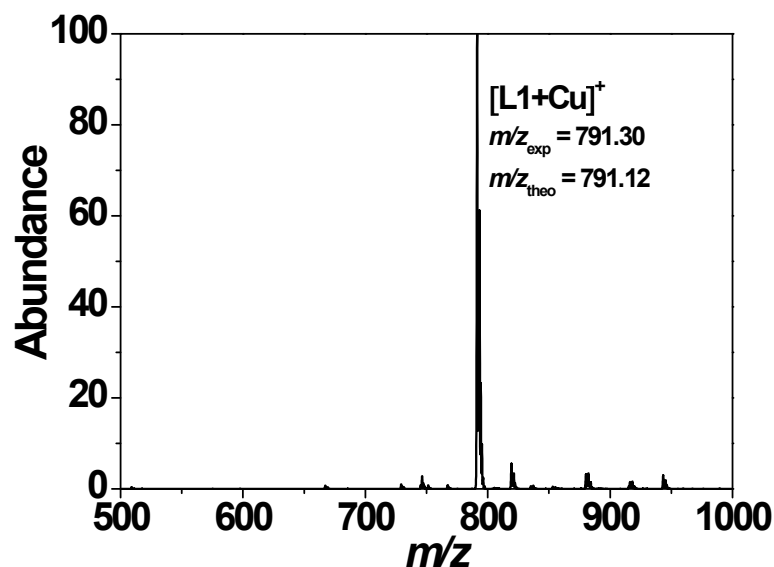

**Figure S23.** ESI mass spectra of the cupric complexes formed with ligand **L1**. Solvent:  $CH_3CN/CH_3OH$  (1/1  $v/v$ ); positive mode. (a)  $[Cu^{2+}]_0 = [L1]_0 = 5 \times 10^{-5}$  M;  $V_c = 150$  V. The ESI-MS spectra were limited to the areas of interest. No peaks of interest were detected in the excluded  $m/z$  regions. For the  $[L1+Cu]^+$ , it is suggested that the copper cation is reduced.

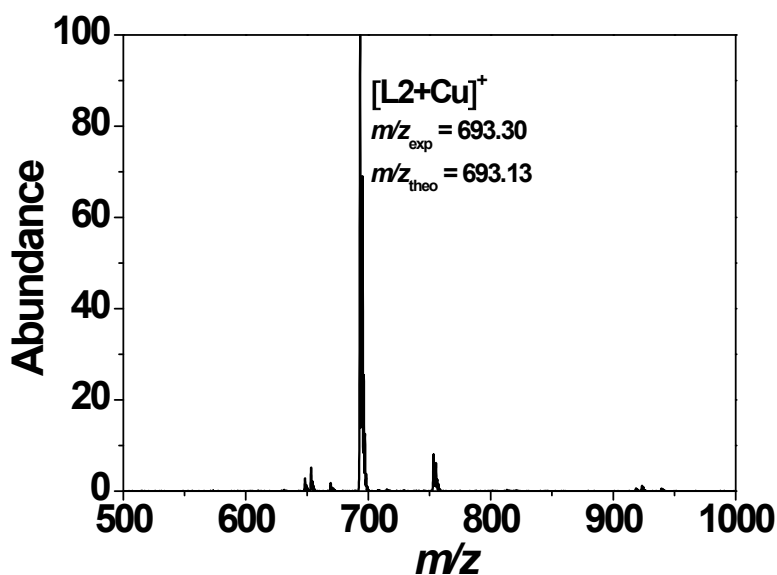

**Figure S24.** ESI mass spectra of the cupric complexes formed with ligand **L2**. Solvent:  $CH_3CN/CH_3OH$  (1/1  $v/v$ ); positive mode. (a)  $[Cu^{2+}]_0 = [L2]_0 = 5 \times 10^{-5}$  M;  $V_c = 150$  V. The ESI-MS spectra were limited to the areas of interest. No peaks of interest were detected in the excluded  $m/z$  regions. For the  $[L2+Cu]^+$ , it is suggested that the copper cation is reduced.

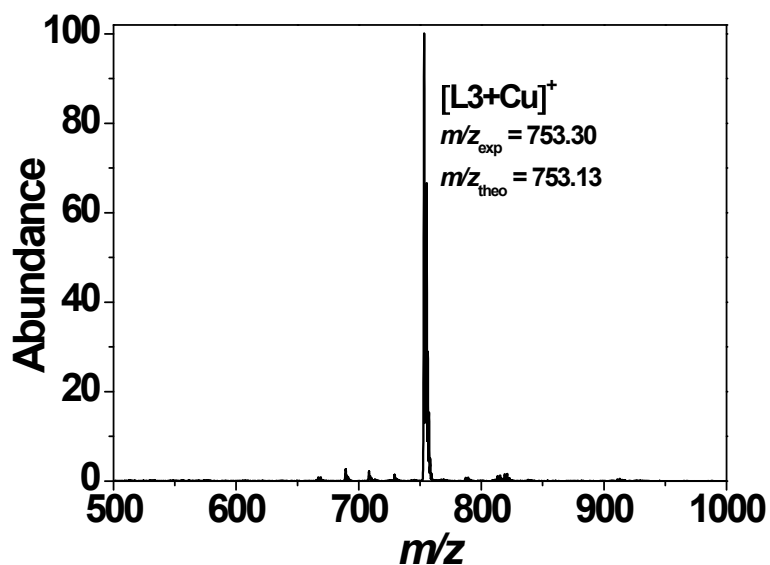

**Figure S25.** ESI mass spectra of the cupric complexes formed with ligand **L3**. Solvent:  $CH_3CN/CH_3OH$  (1/1 v/v); positive mode. (a)  $[Cu^{2+}]_0 = [L3]_0 = 5 \times 10^{-5}$  M;  $V_c = 150$  V. The ESI-MS spectra were limited to the areas of interest. No peaks of interest were detected in the excluded  $m/z$  regions. For the  $[L3+Cu]^+$ , it is suggested that the copper cation is reduced.

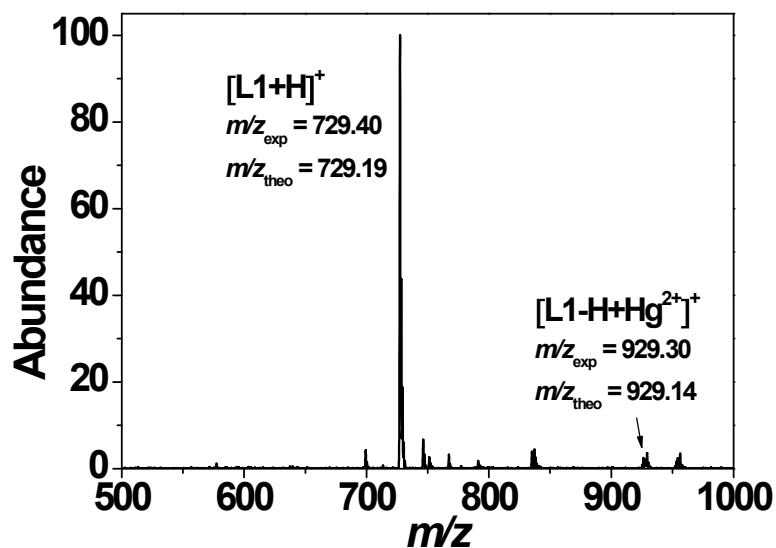

**Figure S26.** ESI mass spectra of the mercuric complexes formed with ligand **L1**. Solvent:  $CH_3CN/CH_3OH$  (1/1 v/v); positive mode. (a)  $[Hg^{2+}]_0 = 1.5 \times 10^{-4}$  M;  $[L1]_0 = 5 \times 10^{-5}$  M;  $V_c = 150$  V. The ESI-MS spectra were limited to the areas of interest. No peaks of interest were detected in the excluded  $m/z$  regions.

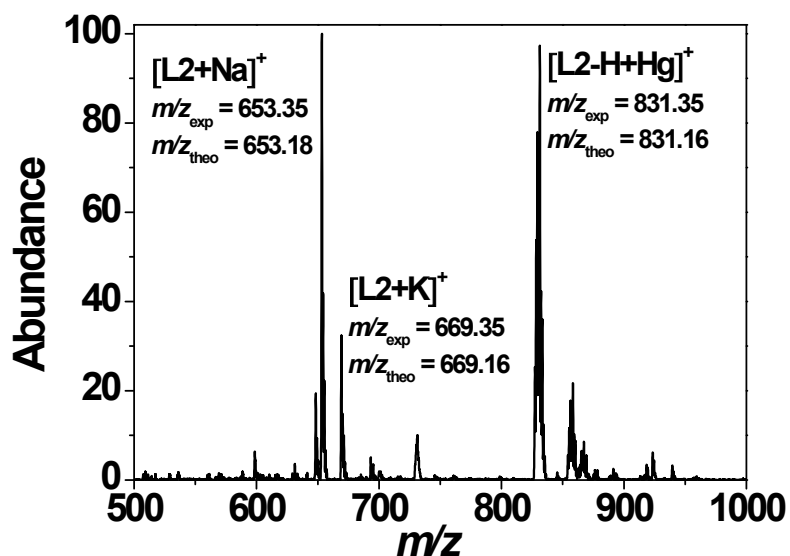

**Figure S27.** ESI mass spectra of the mercuric complexes formed with ligand **L2**. Solvent:  $\text{CH}_3\text{CN}/\text{CH}_3\text{OH}$  (1/1 v/v); positive mode. (a)  $[\text{Hg}^{2+}]_0 = [\text{L2}]_0 = 5 \times 10^{-5} \text{ M}$ ;  $V_c = 150 \text{ V}$ . The ESI-MS spectra were limited to the areas of interest. No peaks of interest were detected in the excluded  $m/z$  regions.

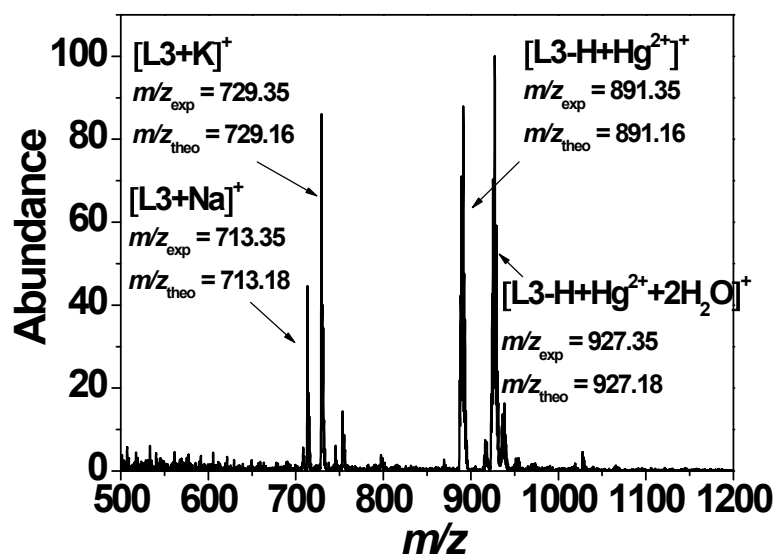

**Figure S28.** ESI mass spectra of the mercuric complexes formed with ligand **L3**. Solvent:  $\text{CH}_3\text{CN}/\text{CH}_3\text{OH}$  (1/1 v/v); positive mode. (a)  $[\text{Hg}^{2+}]_0 = [\text{L3}]_0 = 5 \times 10^{-5} \text{ M}$ ;  $V_c = 150 \text{ V}$ . The ESI-MS spectra were limited to the areas of interest. No peaks of interest were detected in the excluded  $m/z$  regions.



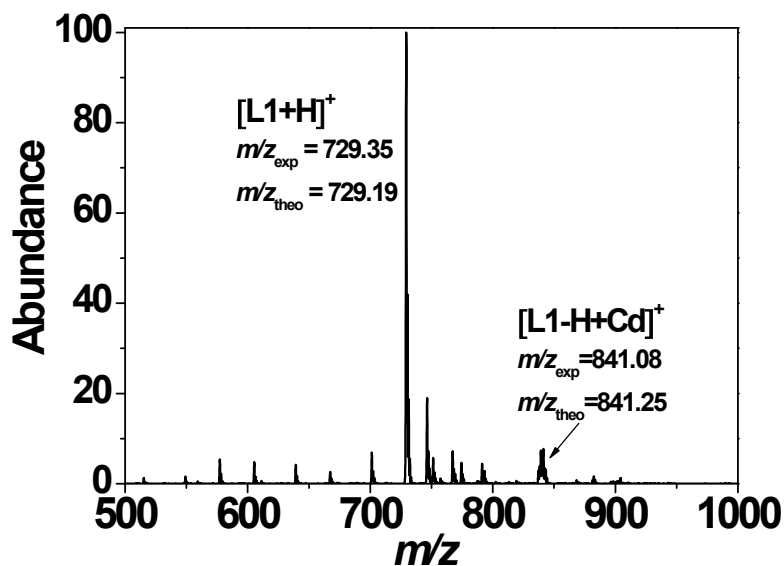

**Figure S29.** ESI mass spectra of the cadmium(II) complexes formed with ligand **L1**. Solvent:  $\text{CH}_3\text{CN}/\text{CH}_3\text{OH}$  (1/1 v/v); positive mode. (a)  $[\text{Cd}^{2+}]_0 = [\text{L1}]_0 = 5 \times 10^{-5} \text{ M}$ ;  $V_c = 200 \text{ V}$ . The ESI-MS spectra were limited to the areas of interest. No peaks of interest were detected in the excluded  $m/z$  regions.

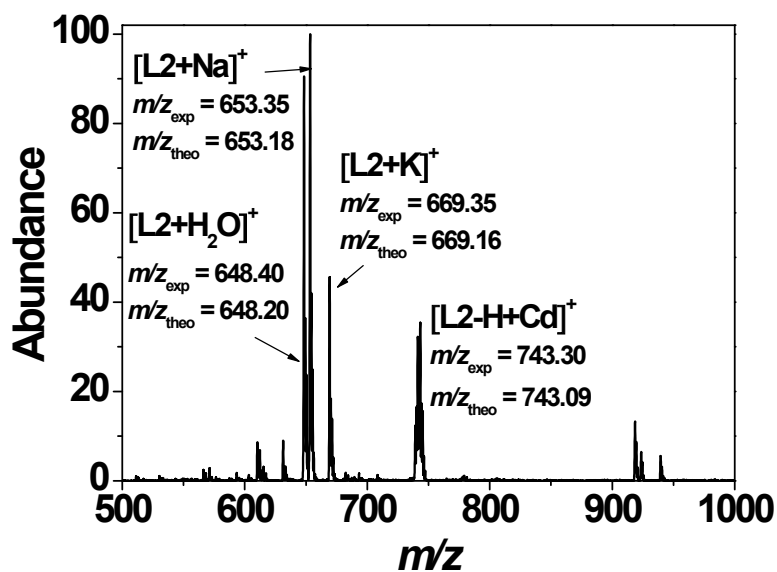

**Figure S30.** ESI mass spectra of the cadmium(II) complexes formed with ligand **L2**. Solvent:  $\text{CH}_3\text{CN}/\text{CH}_3\text{OH}$  (1/1 v/v); positive mode. (a)  $[\text{Cd}^{2+}]_0 = 1.5 \times 10^{-4} \text{ M}$ ;  $[\text{L2}]_0 = 5 \times 10^{-5} \text{ M}$ ;  $V_c = 150 \text{ V}$ . The ESI-MS spectra were limited to the areas of interest. No peaks of interest were detected in the excluded  $m/z$  regions. For the  $[\text{L2}+\text{H}_2\text{O}]^+$ , it is suggested that one phenol is oxidized.

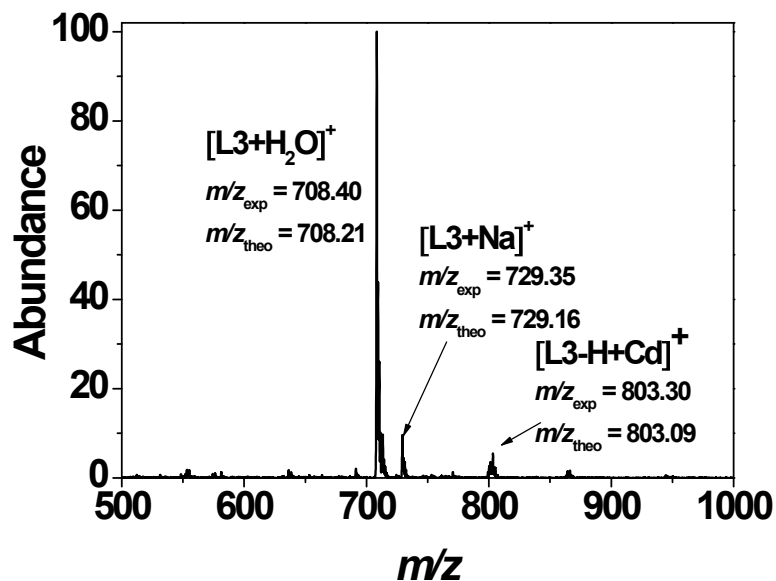

**Figure S31.** ESI mass spectra of the cadmium(II) complexes formed with ligand **L3**. Solvent:  $\text{CH}_3\text{CN}/\text{CH}_3\text{OH}$  (1/1 v/v); positive mode. (a)  $[\text{Cd}^{2+}]_0 = 1.5 \times 10^{-4} \text{ M}$ ;  $[\text{L3}]_0 = 5 \times 10^{-5} \text{ M}$ ;  $V_c = 150 \text{ V}$ . The ESI-MS spectra were limited to the areas of interest. No peaks of interest were detected in the excluded  $m/z$  regions. For the  $[\text{L3}+\text{H}_2\text{O}]^+$ , it is suggested that one phenol is oxidized.

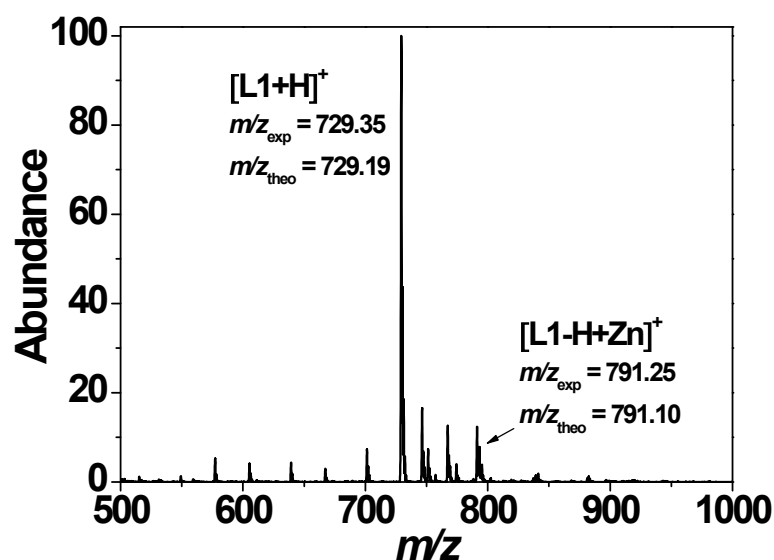

**Figure S32.** ESI mass spectra of the zinc(II) complexes formed with ligand **L1**. Solvent:  $\text{CH}_3\text{CN}/\text{CH}_3\text{OH}$  (1/1 v/v); positive mode. (a)  $[\text{Zn}^{2+}]_0 = [\text{L1}]_0 = 5 \times 10^{-5} \text{ M}$ ;  $V_c = 200 \text{ V}$ . The ESI-MS spectra were limited to the areas of interest. No peaks of interest were detected in the excluded  $m/z$  regions.

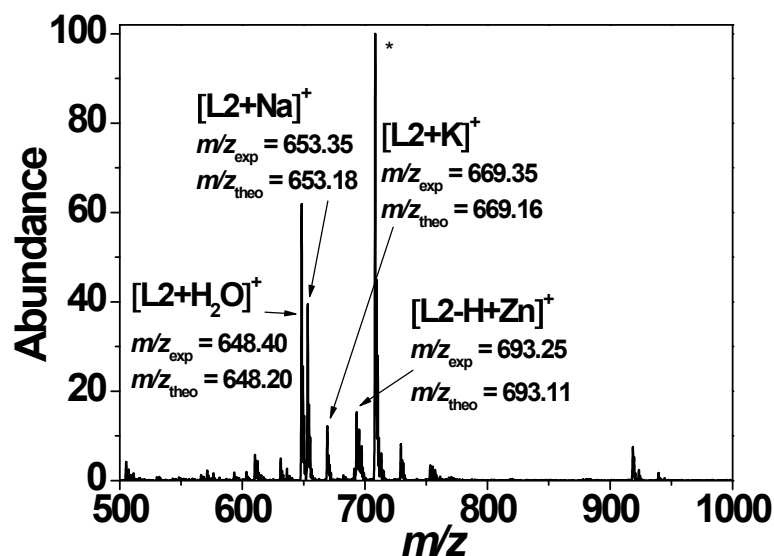

**Figure S33.** ESI mass spectra of the zinc(II) complexes formed with ligand **L2**. Solvent:  $\text{CH}_3\text{CN}/\text{CH}_3\text{OH}$  (1/1 v/v); positive mode. (a)  $[\text{Zn}^{2+}]_0 = 3 \times 10^{-4} \text{ M}$ ;  $[\text{L2}]_0 = 5 \times 10^{-5} \text{ M}$ ;  $V_c = 150 \text{ V}$ . The ESI-MS spectra were limited to the areas of interest. No peaks of interest were detected in the excluded  $m/z$  regions. For the  $[\text{L2}+\text{H}_2\text{O}]^+$ , it is suggested that one phenol is oxidized. \* An intense peak at  $m/z$  708.40 could not be characterized.

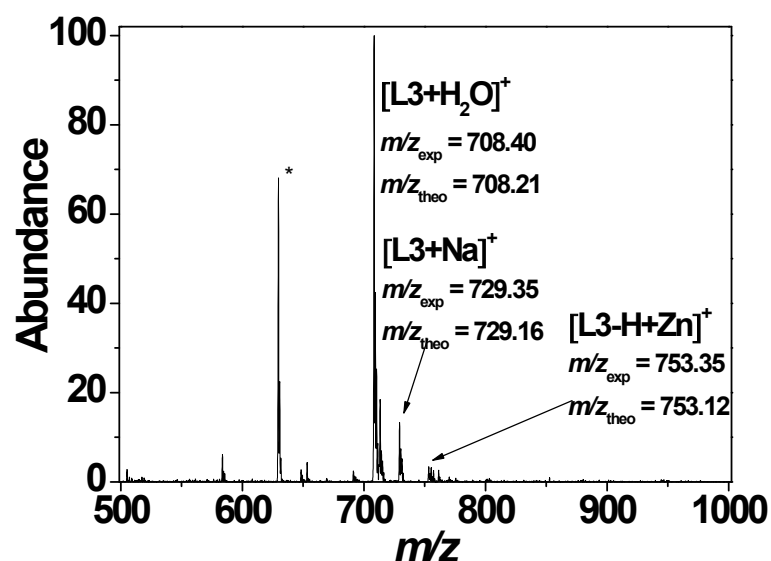

**Figure S34.** ESI mass spectra of the zinc(II) complexes formed with ligand **L3**. Solvent:  $\text{CH}_3\text{CN}/\text{CH}_3\text{OH}$  (1/1 v/v); positive mode. (a)  $[\text{Zn}^{2+}]_0 = 1.5 \times 10^{-4} \text{ M}$ ;  $[\text{L3}]_0 = 5 \times 10^{-5} \text{ M}$ ;  $V_c = 150 \text{ V}$ . The ESI-MS spectra were limited to the areas of interest. No peaks of interest were detected in the excluded  $m/z$  regions. For the  $[\text{L3}+\text{H}_2\text{O}]^+$ , it is suggested that one phenol is oxidized. \* An intense peak at  $m/z$  629.70 could not be characterized.

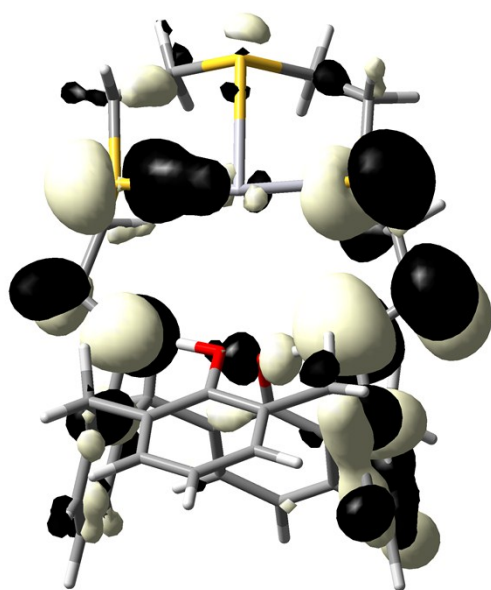

**MO165**

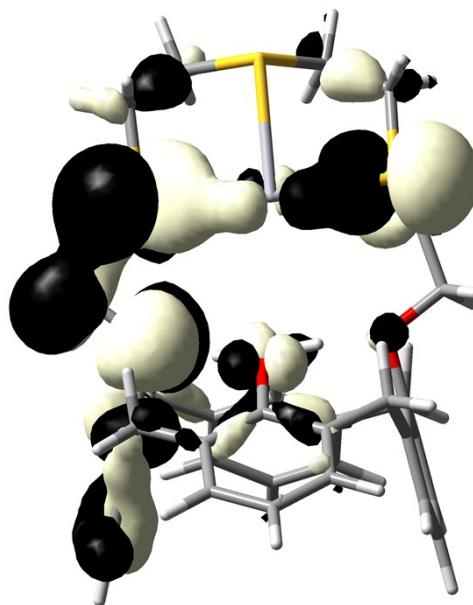

**MO166**

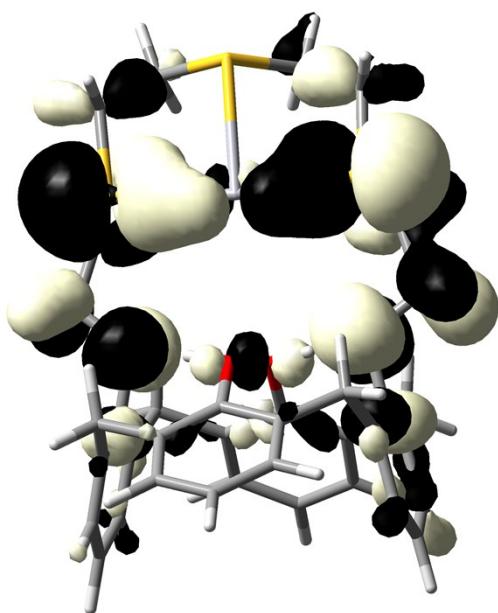

**MO167**

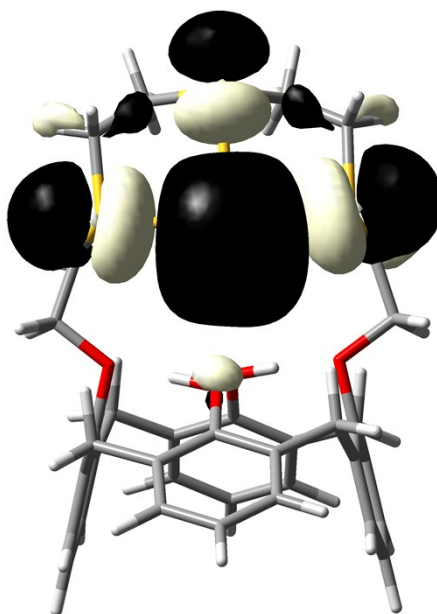

**MO177 (LUMO)**

**Figure S35.** Calculated isosurfaces (0.02 a. u.) for MOs 165, 166, 167 and 177 (LUMO) of  $[\text{HgL2}]^{2+}$  (TPSSh/TZVP, acetonitrile solution).

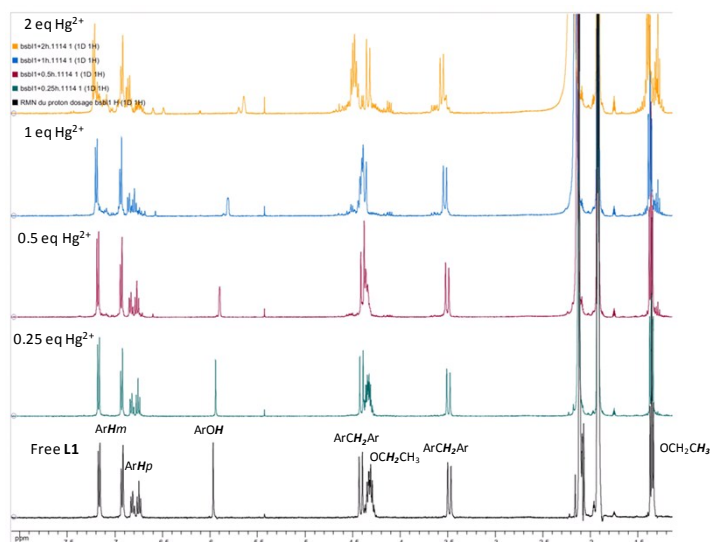

A horizontal scale for chemical shift in ppm, ranging from 0 to 10. Major tick marks are labeled at 0, 2, 4, 6, 8, and 10. Minor tick marks are present every 0.2 units.

**Table S1.** Optimized (TPSSh/TZVP) bond distances of the metal coordination environments in the mercuric complexes with ligands **L1**, **L2** and **L3**.

|                 | [HgL1] <sup>2+</sup> | [HgL2] <sup>2+</sup> | [HgL3] <sup>2+</sup> |
|-----------------|----------------------|----------------------|----------------------|
| <b>Hg1-S(1)</b> | 2.433                | 2.592                | 2.591                |
| <b>Hg1-S(2)</b> | 2.432                | 2.630                | 2.607                |
| <b>Hg1-S(3)</b> | -                    | 2.807                | 2.787                |
| <b>Hg1-S(4)</b> | -                    | -                    | 2.730                |

**Table S2.** Optimized (TPSSh/SVP) bond distances of the metal coordination environments in the cupric complexes with ligands **L1**, **L2** and **L3**.

|                 | [CuL1] <sup>2+</sup> | [CuL2] <sup>2+</sup> | [CuL3] <sup>2+</sup> |
|-----------------|----------------------|----------------------|----------------------|
| <b>Cu1-O(1)</b> | 2.157                | -                    | -                    |
| <b>Cu1-O(2)</b> | 2.230                | -                    | -                    |
| <b>Cu1-O(3)</b> | 2.621                | -                    | -                    |
| <b>Cu1-O(4)</b> | 2.153                | 2.134                | -                    |
| <b>Cu1-S(1)</b> | 2.419                | 2.394                | 2.410                |
| <b>Cu1-S(2)</b> | 2.373                | 2.427                | 2.403                |
| <b>Cu1-S(3)</b> | -                    | 2.405                | 2.367                |
| <b>Cu1-S(4)</b> | -                    | -                    | 2.356                |
